# Supplementary material for: Structures and magnetism of azide- and carboxylate-bridged metal(ii) systems derived from 1,2-bis(N-carboxymethyl-4-pyridinio)ethane
Source: Royal Society of Chemistry journal article supplement (doi:10.1039/b919096a), 2009-12-18
Supplement: b919096a.pdf [file b919096a.pdf]

## Supporting Information

### Structures and magnetism of azide- and carboxylate-bridged metal(II) systems derived from 1,2-bis(N-carboxymethyl-4-pyridinio)ethane

Yu Ma, Yan-Qing Wen, Jian-Yong Zhang, En-Qing Gao,\* and Cai-Ming Liu

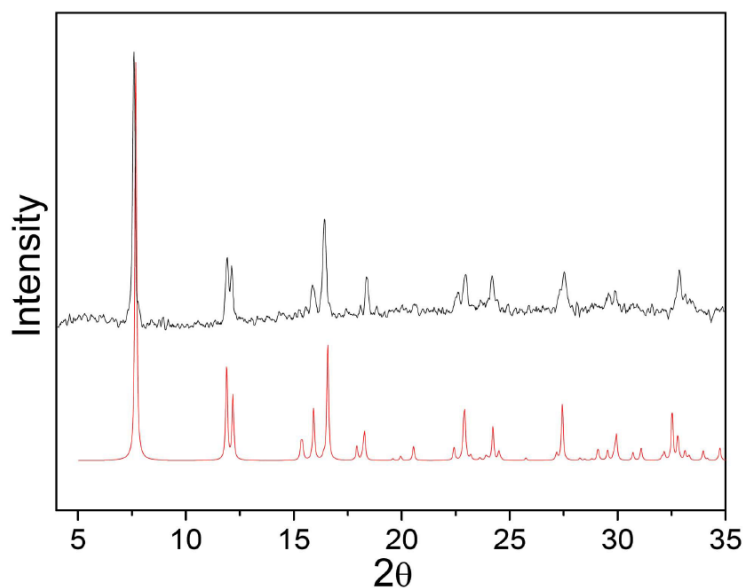

**Fig. S1** Comparison of the XRD patterns measured for **3** (black) and that calculated from the single-crystal data of **2** (red)

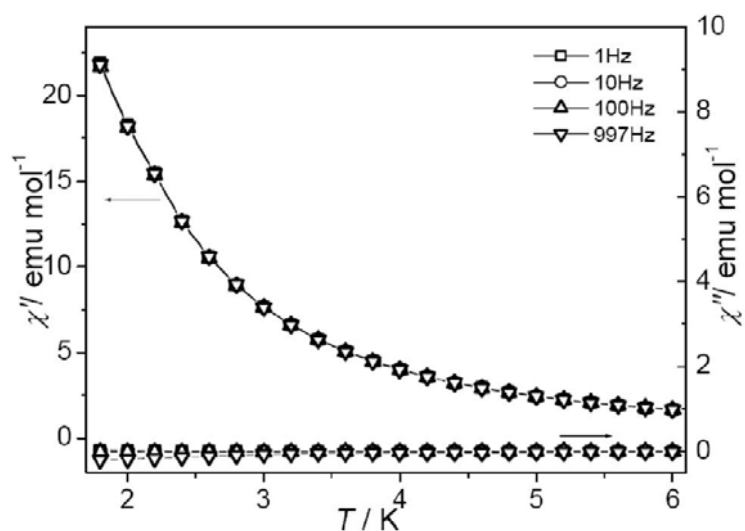

**Fig. S2** Temperature dependence of ac susceptibilities of **2** at different frequencies
